# Supplementary material
Source: PubMed Central journal article supplement (PMC7155937)
Supplement: NIHMS1578011-supplement-Supplemental_Figure_1.pdf [file NIHMS1578011-supplement-Supplemental_Figure_1.pdf]

Supplemental Figure S1: Exposure status categorization schematic. Shaded areas indicate exposed time, extending 7 days from the last exposure to a given antipsychotic. A=atypical antipsychotic; T=typical antipsychotic

| Hospital day   | 1             | 2 | 3    | 4 | 5 | 6 | 7 | 8         | 9            | 10 | 11        | 12 | 13 | 14 |
|----------------|---------------|---|------|---|---|---|---|-----------|--------------|----|-----------|----|----|----|
| Scenario 1     |               |   |      |   |   |   |   |           |              |    |           |    |    |    |
| Exposure       | A             |   |      |   |   |   |   |           |              |    |           |    |    |    |
| Categorization | Atypical Only |   |      |   |   |   |   | Unexposed |              |    |           |    |    |    |
| Scenario 2     |               |   |      |   |   |   |   |           |              |    |           |    |    |    |
| Exposure       | A             | A |      |   |   |   |   |           |              |    |           |    |    |    |
| Categorization | Atypical Only |   |      |   |   |   |   | Unexposed |              |    |           |    |    |    |
| Scenario 3     |               |   |      |   |   |   |   |           |              |    |           |    |    |    |
| Exposure       | A             | A | A    |   |   |   |   |           |              |    |           |    |    |    |
| Exposure       |               |   | T    |   |   |   |   |           |              |    |           |    |    |    |
| Categorization | Atypical Only |   | Both |   |   |   |   |           | Unexposed    |    |           |    |    |    |
| Scenario 4     |               |   |      |   |   |   |   |           |              |    |           |    |    |    |
| Exposure       | A             | A | A    |   |   |   |   |           |              |    |           |    |    |    |
| Exposure       |               |   | T    | T | T |   |   |           |              |    |           |    |    |    |
| Categorization | Atypical Only |   | Both |   |   |   |   |           | Typical Only |    | Unexposed |    |    |    |
